# Supplementary material
Source: PubMed Central journal article supplement (PMC4043872)

**Supplementary Information****Supplementary table 1. Steps for high throughput screen**

| S. No. | Steps for screening                                            | Compounds |
|--------|----------------------------------------------------------------|-----------|
| 1      | In- vitro absorbance based kinetic screen using esterase assay | 101,000   |
| 2      | Compounds with >60% inhibition                                 | 436       |
| 3      | Secondary screen by cherry-picking the initial hits            | 71        |
| 4      | Validation of inhibitors using dehydrogenase assay             | 55        |
| 5      | Structural classification of compounds                         | 55        |
| 6      | Testing specificity against ALDH1A1 and ALDH2                  | 55        |
| 7      | IC <sub>50</sub> determination for selective inhibitors        | 2         |
| 8      | Selective inhibitors                                           | 2         |

**Figure S1 (A). Hits from ChemDiv Screen**

| Compound | Structure | IC <sub>50</sub> (μM) |       |         |
|----------|-----------|-----------------------|-------|---------|
|          |           | ALDH1A1               | ALDH2 | ALDH3A1 |
| CD4      |           | 21.2                  | 1.4   | 2.5     |
| CD5      |           | 8.2                   | 1.2   | 1.5     |
| CD7      |           | 0.7                   | NI    | 25.5    |
| CD8      |           | 0.8                   | 11.1  | 6.3     |
| CD10     |           | 4.0                   | 2.2   | 3.4     |
| CD11     |           | 5.9                   | 6.5   | 10.2    |
| CD12     |           | 4.2                   | 5.3   | 5.6     |

| Compound | Structure                                                                           | IC <sub>50</sub> (μM) |       |         |
|----------|-------------------------------------------------------------------------------------|-----------------------|-------|---------|
|          |                                                                                     | ALDH1A1               | ALDH2 | ALDH3A1 |
| CD3      | 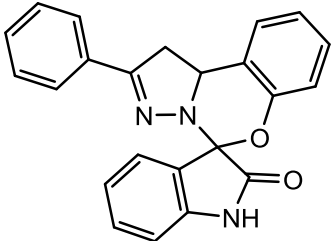   | 6.5                   | 41.8  | 38.5    |
| CD13     |    | 6.3                   | 7.3   | 60      |
| CD14     |    | 10.4                  | 13.7  | 71.5    |
| CD20     |  | 33                    | NI    | 41      |

**Figure S1 (B). Hits from ChemBridge Screen**

| Compound | Structure                                                                          | Inhibition at 10 $\mu$ M concentration |       |                                        |
|----------|------------------------------------------------------------------------------------|----------------------------------------|-------|----------------------------------------|
|          |                                                                                    | ALDH1A1                                | ALDH2 | ALDH3A1<br>IC <sub>50</sub> ( $\mu$ M) |
| CB1      | 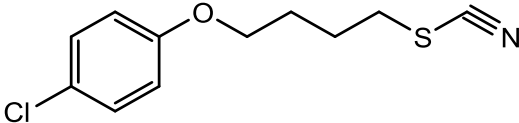  | >50%                                   | NI    | 3.7                                    |
| CB2      |   | <20%                                   | NI    | 5.2                                    |
| CB12     |   | NI                                     | >50%  | 3.2                                    |
| CB13     |  | <20%                                   | NI    | 11.7                                   |

| Compound | Structure | % activity left at 10 $\mu$ M inhibitor concentration |         |         |
|----------|-----------|-------------------------------------------------------|---------|---------|
|          |           | ALDH1A1                                               | ALDH2   | ALDH3A1 |
| CB41     |           | 100% (NI)                                             | 90%(NI) | 45% (I) |
| CB35     |           | 100% (NI)                                             | 86%(NI) | 46% (I) |
| CB36     |           | 93% (NI)                                              | 76%(NI) | 30% (I) |
| CB38     |           | 90% (NI)                                              | 83%(NI) | 40% (I) |
| CB40     |           | 95% (NI)                                              | 67%(NI) | 30% (I) |
| CB42     |           | 100% (NI)                                             | 74%(NI) | 46% (I) |
| CB37     |           | 100% (NI)                                             | 83%(NI) | 30% (I) |
| CB26     |           | 100% (NI)                                             | 88%(NI) | 45% (I) |
| CB39     |           | 100% (NI)                                             | 82%(NI) | 32% (I) |

|      |                                                                                     |           |          |         |
|------|-------------------------------------------------------------------------------------|-----------|----------|---------|
| CB11 | 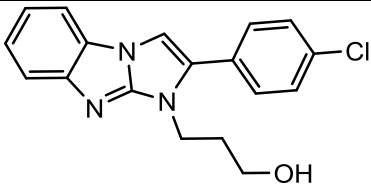   | 100% (NI) | 96%(NI)  | 61% (I) |
| CB5  |    | 107% (NI) | 100%(NI) | 34% (I) |
| CB32 |    | 100% (NI) | 84%(NI)  | 36% (I) |
| CB16 |    | 100% (NI) | 100%(NI) | 50% (I) |
| CB3  |   | 71% (NI)  | 100%(NI) | 55% (I) |
| CB21 |  | 104% (NI) | 100%(NI) | 58% (I) |
| CB23 |  | 110% (NI) | 94%(NI)  | 65% (I) |
| CB6  |  | 112% (NI) | 44%(NI)  | 6% (I)  |
| CB14 |  | 91% (NI)  | 97%(NI)  | 47% (I) |
| CB4  |  | 71% (NI)  | 100%(NI) | 60% (I) |

|             |                                                                                   |                  |                 |                |
|-------------|-----------------------------------------------------------------------------------|------------------|-----------------|----------------|
| <b>CB10</b> | 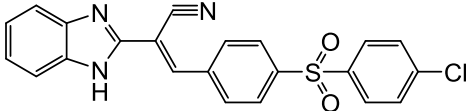 | <b>110% (NI)</b> | <b>101%(NI)</b> | <b>58% (I)</b> |
| <b>CB27</b> |  | <b>138% (NI)</b> | <b>91%(NI)</b>  | <b>43% (I)</b> |

NI- No inhibition at 10 micromolar concentration

I - Inhibition at 10 micromolar concentration

Figure S2. Calculation of ED<sub>50</sub> for A549, SF767 and CCD13Lu cell lines

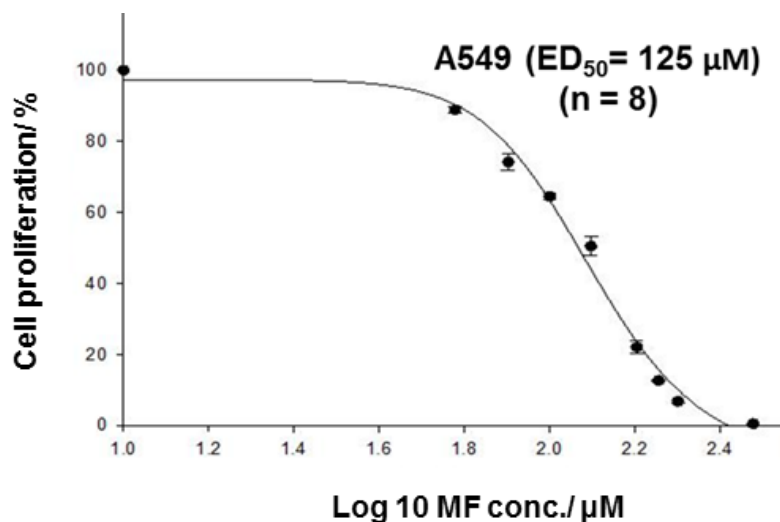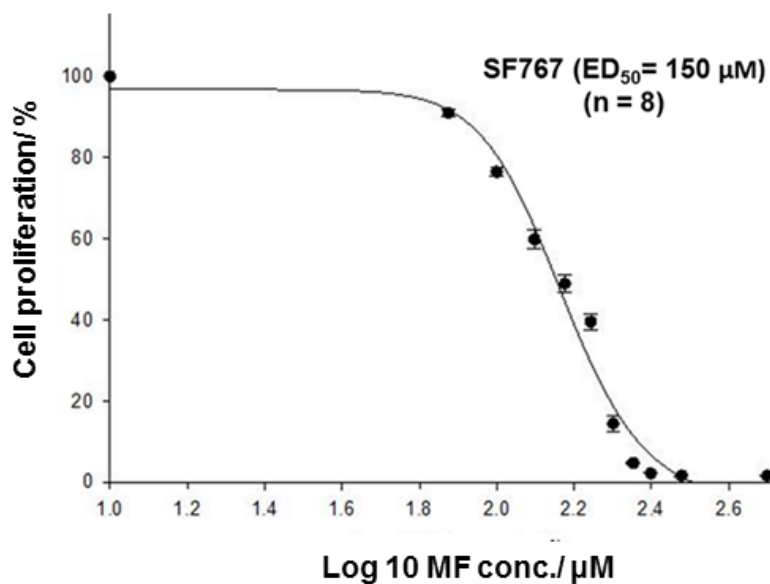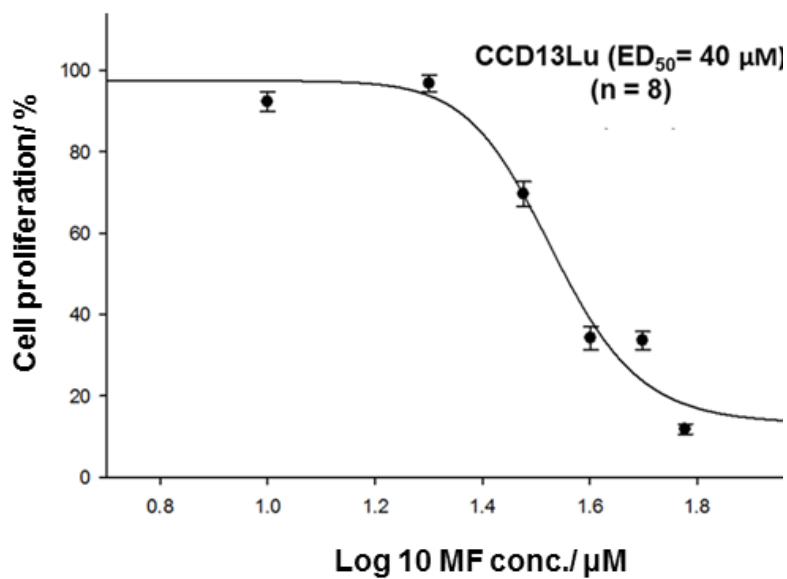



**Figure S3 (A). Quantitation of ALDH1A1 expression in A549 cell line**

Serial dilutions of A549 cell lysates (0.5  $\mu$ g- 22.5  $\mu$ g) were compared against serial dilutions of recombinantly purified ALDH1A1 (5 ng- 250 ng). Purified recombinant ALDH1A1 protein served as positive control and GAPDH served as a loading control.

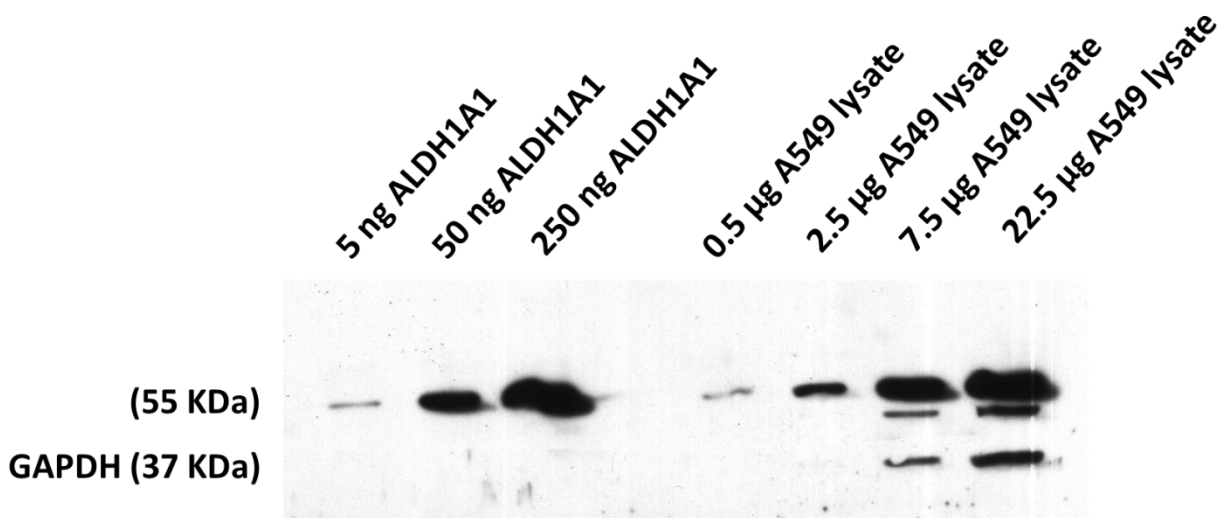

**Figure S3 (B). Quantitation of ALDH3A1 expression in A549 cell line**

Serial dilutions of A549 cell lysates (0.5  $\mu$ g- 22.5  $\mu$ g) were compared against serial dilutions of recombinantly purified ALDH3A1 (5 ng- 50 ng). Purified recombinant His-tagged ALDH3A1 protein served as positive control and GAPDH served as a loading control.

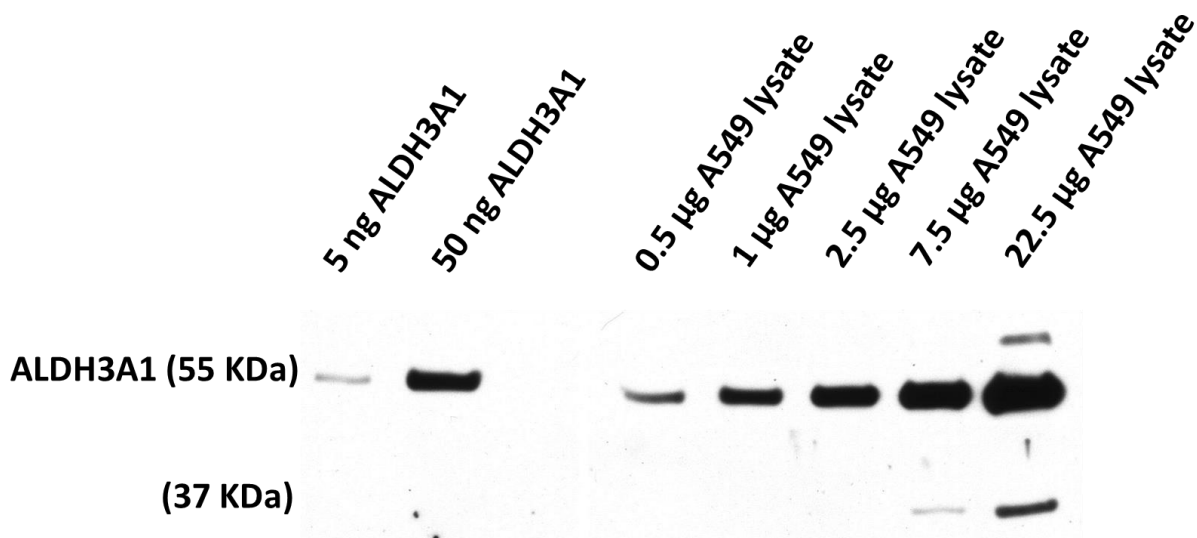

**Figure S3 (C). Quantitation of ALDH3A1 expression in SF767 cell line**

Serial dilutions of SF767 cell lysates (1  $\mu$ g- 10  $\mu$ g) were compared against serial dilutions of recombinantly purified ALDH3A1 (50 ng- 300 ng). Purified recombinant His-tagged ALDH3A1 protein served as positive control and GAPDH served as a loading control.

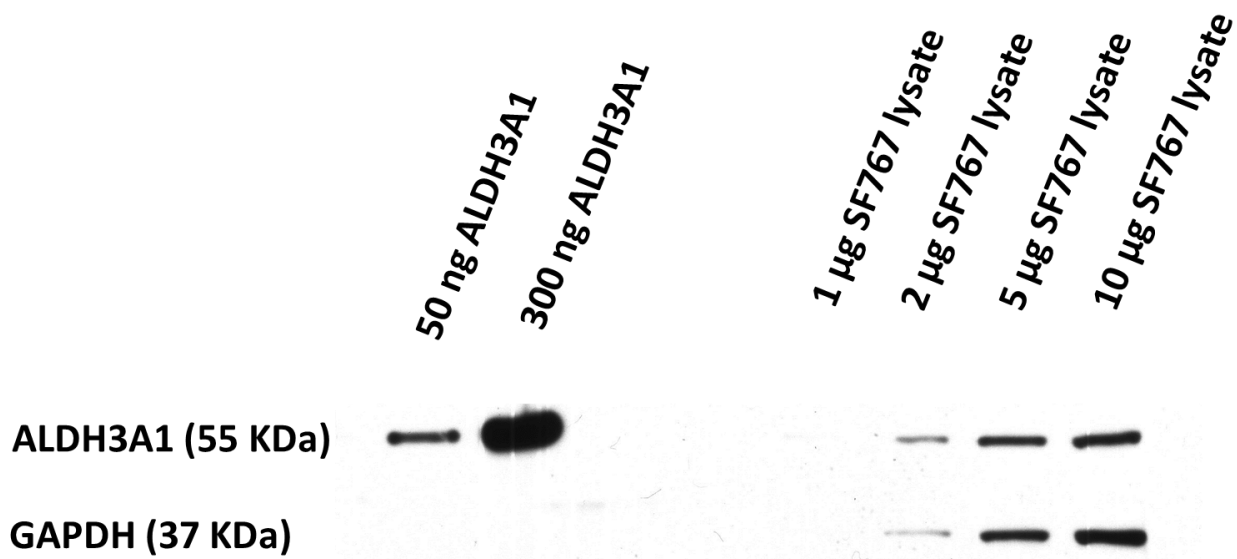

Supplement: NIHMS584861-supplement-Supporting_Information.pdf [file NIHMS584861-supplement-Supporting_Information.pdf]
